# Supplementary material for: An Inter-Ethnic Comparison Study of Ziprasidone Plasma Levels, Dosage and Clinical Response in Patients with Schizophrenia
Source: PubMed Central journal article supplement — Psychiatry Investig. 2017 May 16;14(3):360–7. doi: 10.4306/pi.2017.14.3.360 (PMC5440439; doi:10.4306/pi.2017.14.3.360), 2017-05-16
Supplement: pi-14-360-s001.pdf [file pi-14-360-s001.pdf]

**Supplementary Table 1.** Comparison of ziprasidone plasma concentration and dosage within intra-ethnic groups at week 1, week 2, week 4 and week 6 after ziprasidone treatment

| Items                   | T1<br>Mean (SD) | T2<br>Mean (SD) | T4<br>Mean (SD) | T6<br>Mean (SD) | F/p          | Post Hoc |          |          |          |          |          |
|-------------------------|-----------------|-----------------|-----------------|-----------------|--------------|----------|----------|----------|----------|----------|----------|
|                         |                 |                 |                 |                 |              | T1 vs T2 | T1 vs T4 | T1 vs T6 | T2 vs T4 | T2 vs T6 | T4 vs T6 |
|                         |                 |                 |                 |                 |              | P        | P        | P        | P        | P        | P        |
| Han Chinese             |                 |                 |                 |                 |              |          |          |          |          |          |          |
| Zip CPs (ng/mL)         | 65.81 (15.04)   | 82.45 (14.33)   | 99.47 (22.77)   | 104.60 (24.11)  | 46.08/0.000  | 0.000    | 0.000    | 0.000    | 0.000    | 0.000    | 0.059    |
| Zip CPs/dose (ng/mL)/mg | 0.80 (0.21)     | 0.73 (0.17)     | 0.80 (0.18)     | 0.76 (0.16)     | 1.325/0.268  | 0.100    | 0.991    | 0.318    | 0.098    | 0.517    | 0.312    |
| Dose (mg/d)             | 84.17 (10.88)   | 113.75 (14.96)  | 126.25 (14.95)  | 138.75 (18.18)  | 146.78/0.000 | 0.000    | 0.000    | 0.000    | 0.001    | 0.000    | 0.002    |
| Responder/non-res       | 5/43            | 20/28           | 36/12           | 40/8            | 64.40/0.000  | 0.000    | 0.000    | 0.000    | 0.002    | 0.000    | 0.452    |
| Mongolian               |                 |                 |                 |                 |              |          |          |          |          |          |          |
| Zip CPs (ng/mL)         | 61.83 (12.18)   | 78.39 (14.65)   | 91.84 (16.31)   | 96.29 (17.29)   | 41.94/0.000  | 0.000    | 0.000    | 0.000    | 0.000    | 0.0000   | 0.250    |
| Zip CPs (ng/mL)/mg      | 0.71 (0.17)     | 0.64 (0.13)     | 0.63 (0.12)     | 0.64 (0.12)     | 3.551/0.016  | 0.014    | 0.005    | 0.010    | 0.711    | 0.887    | 0.819    |
| Dose (mg/d)             | 88.10 (11.74)   | 123.33 (8.74)   | 147.14 (11.54)  | 152.38 (11.65)  | 261.56/0.000 | 0.000    | 0.000    | 0.000    | 0.003    | 0.000    | 0.221    |
| Responder/non-res       | 5/37            | 16/26           | 30/12           | 32/10           | 45.98/0.000  | 0.000    | 0.000    | 0.000    | 0.004    | 0.000    | 0.804    |

SD: standard deviation, Zip CPs: ziprasidone plasma concentration, T1: week 1, T2: week 2, T4: week 4, T6: week 6
